# Supplementary material for: Soluble immune mediators orchestrate protective in vitro granulomatous responses across Mycobacterium tuberculosis complex lineages
Source: eLife. 2025 Mar 31;13:RP99062. doi: 10.7554/eLife.99062 (PMC11957536; doi:10.7554/eLife.99062)
Supplement: Source data 1. [file elife-99062-data1.xlsx]

## Sheet: Data Fig 1
	CFU/well data
		Donor 1		Donor 2		Donor 3		Donor 4
		d1 p.i.	d8 p.i.	d1 p.i.	d8 p.i.	d1 p.i.	d8 p.i.	d1 p.i.	d8 p.i.
	H37Rv	4733.33	174000	5633.33	77000	6200	125667	5733.33	146667
	L1A	4550	60200	4280	62500	4580	75000	4430	41700
	L1B	2300	280000	3500	142333	3133.33	236167	3766.67	203333
	L1C	3666.67	118333	3233.33	70000	3500	115667	3200	106333
	L2A	4800	97666.7	4300	49000	5900	106667	5300	58666.7
	L2B	4066.67	303333	4300	206667	6166.67	490000	5466.67	423333
	L2C	4566.67	426667	5133.33	590000	4633.33	630000	5233.33	566667
	L3A	4400	200000	3833.33	276667	6533.33	436667	3800	236667
	L3B	4333.33	270000	4366.67	96666.7	5500	266667	5033.33	213333
	L3C	5966.67	266667	6800	230000	6933.33	236667	6733.33	233333
	L4A	4833.33	356667	4733.33	256667	4700	436667	4433.33	296667
	L4B	4700	240000	5466.67	124333	5766.67	250000	5566.67	190000
	L4C	5300	293333	4200	223333	4533.33	356667	5166.67	246667
	L5A	3766.67	65000	5166.67	79333.3	2566.67	88000	4833.33	121333
	L5B	4800	141000	5020	110000	4330	151000	4180	185000

## Sheet: Data Fig 2
	Number of auramine-O (Au)- and/or Nile red (NR)-positive bacilli counted per sample
		Donor 1			Donor 2			Donor 3			Donor 4
		Au+ NR-	Au- NR+	Au+ NR+	Au+ NR-	Au- NR+	Au+ NR+	Au+ NR-	Au- NR+	Au+ NR+	Au+ NR-	Au- NR+	Au+ NR+
	H37Rv	65	112	31	107	95	5	110	101	4	104	101	5
	L1A	115	93	16	123	95	3	94	111	5	112	85	7
	L1B	121	79	23	108	97	2	82	121	0	93	117	4
	L1C	112	76	37	125	87	2	108	99	3	106	95	4
	L2A	81	113	42	106	94	5	83	123	0	90	109	5
	L2B	103	93	25	100	103	2	79	124	2	100	93	9
	L2C	84	101	32	79	121	2	81	123	7	92	127	5
	L3A	130	86	12	141	61	2	106	98	3	149	67	3
	L3B	114	73	21	132	75	4	89	116	2	108	90	3
	L3C	145	74	6	178	52	4	156	46	7	156	54	2
	L4A	158	61	4	140	60	5	117	98	5	136	81	2
	L4B	85	129	18	112	88	4	107	96	2	114	86	5
	L4C	86	123	7	108	95	2	106	101	6	101	103	3
	L5A	109	92	10	99	102	4	65	129	0	121	76	5
	L5B	89	104	18	153	49	1	93	105	3	96	105	4

## Sheet: Data Fig 3
	Bright field images used to quantify in vitro granuloma formation (No. aggregates) and measure the area and aspect ratio (AR) of each individual aggregate
	Donor 1																														Donor 2
	H37Rv		L1A		L1B		L1C		L2A		L2B		L2C		L3A		L3B		L3C		L4A		L4B		L4C		L5A		L5B		H37Rv		L1A		L1B		L1C		L2A		L2B		L2C		L3A		L3B		L3C
No. Granulomas	32		25		22		30		58		16		33		11		14		18		17		26		23		21		52		22		36		25		27		32		15		21		14		27		13
	Area	AR	Area	AR	Area	AR	Area	AR	Area	AR	Area	AR	Area	AR	Area	AR	Area	AR	Area	AR	Area	AR	Area	AR	Area	AR	Area	AR	Area	AR	Area	AR	Area	AR	Area	AR	Area	AR	Area	AR	Area	AR	Area	AR	Area	AR	Area	AR	Area
	3002.43	1.425	3814.67	2.154	1584.26	1.287	8204.13	1.187	6393.68	1.267	3442.28	1.176	6563.65	1.2	4196.57	1.278	5161.05	1.272	3507.59	1.122	4062.06	1.359	3881.7	1.656	5687.4	1.196	1320.86	1.199	13209.5	1.459	6264.36	1.088	3037.03	2.039	9965.28	1.236	5314.15	1.176	4017.94	1.209	16153.9	1.14	3144.72	1.103	2326.86	1.324	3777.04	1.344	2183.27
	5194.78	1.169	2507.21	1.368	3492.02	1.167	4473.8	1.331	1765.9	1.465	4343.62	1.197	7168.29	1.358	4809.85	1.165	3179.32	1.087	24643.5	1.291	2767.15	1.054	9615.38	1.103	14590	1.133	1875.76	1.127	7991.77	1.293	5634.2	1.275	2681.08	1.195	7235.32	1.62	6222.4	1.218	4376.49	1.821	2527.97	1.055	4841.43	1.059	16558.8	1.067	5725.03	1.109	9580.35
	9675.93	1.133	2855.81	1.235	3524.46	1.722	1829.05	1.041	3690.97	1.245	4563.76	1.304	8009.07	1.262	3872.19	1.093	7984.85	1.235	3053.03	1.582	8789.74	1.099	5041.68	1.377	3646.42	1.181	2089.42	1.083	2984.26	1.206	6504.83	1.118	1990.81	1.684	1895.22	1.093	2873.54	1.442	3846.24	1.381	9901.27	1.229	7939.01	1.116	4274.42	1.148	1845.92	1.236	3103.2
	5667.07	1.229	5588.79	1.049	2067.36	1.167	1236.52	1.089	10009.4	1.203	8744.76	1.128	2276.69	2.282	9427.24	1.07	2680.65	1.301	13032.6	1.074	8464.93	1.209	4657.18	1.416	6030.81	1.435	6929.55	1.281	2806.94	1.151	3027.51	1.068	1328.65	1.3	7180.4	1.545	5332.75	1.415	1667.3	1.183	4914.09	2.151	7663.5	1.332	11689.2	1.158	4976.37	1.206	4949.12
	1188.52	1.268	2574.25	1.216	1554.84	1.89	6537.27	1.332	3178.89	1.337	7298.47	1.127	13962	1.474	3566.84	1.136	5607.82	1.229	4321.13	1.715	6725.4	1.079	2203.6	1.141	16932.9	1.096	4893.33	1.213	3475.59	1.576	2827.26	1.015	3346.7	1.598	6545.48	1.073	4124.34	1.144	2596.74	1.179	2997.24	1.06	6991.39	1.317	15807.1	1.371	5282.58	1.452	11331.1
	1320	1.279	2297.45	1.745	2263.72	1.32	4812.88	1.375	1342.49	1.426	2364.05	1.08	2843.27	1.497	2056.98	1.271	9033.24	1.297	4209.97	1.179	2699.68	1.102	3219.54	1.125	6030.81	1.238	2009.84	1.389	1925.07	1.25	2569.06	1.13	1821.27	1.653	4121.31	1.36	5299.45	1.638	2345.03	1.071	9725.24	1.165	6116.88	1.076	4501.05	1.743	8295.39	1.154	24830.4
	1241.28	1.183	5219.87	1.417	3142.13	1.911	2598.04	1.113	7587.38	1.455	5516.56	1.028	2664.64	1.381	3570.3	1.453	9179.42	1.05	2213.55	1.385	2984.7	1.31	3669.35	1.273	17136.6	1.078	5579.27	1.171	1494.73	1.298	13055.5	1.167	2341.13	1.643	2310.43	1.372	7245.7	1.114	3786.12	1.507	10333.3	1.134	4732.87	1.154	15864.2	1.132	22407.9	1.178	6770.82
	1326.05	1.139	1827.75	1.04	2660.75	1.272	1178.13	1.069	12612.2	1.076	3006.32	1.091	3075.52	1.294	2270.64	1.301	2500.73	1.374	3392.98	1.337	2238.2	1.339	3673.67	1.089	18829.4	1.137	1804.4	1.28	1715.73	1.171	4287.39	1.246	5021.35	1.36	13021.3	1.863	4677.51	1.151	4304.26	1.589	2467.42	1.251	8224.02	1.107	2745.09	1.281	5782.12	1.173	2141.75
	6310.64	1.375	3839.32	1.084	3835.86	1.422	1880.09	1.435	4724.22	1.166	5438.71	1.375	6231.49	1.323	1976.53	1.515	25817.8	1.039	3549.11	1.079	5086.65	1.059	2418.12	1.222	1678.97	1.325	1556.57	1.161	2262.42	1.553	2018.92	1.31	2573.82	2.324	6131.58	1.033	2613.61	1.219	10249.9	1.151	2968.69	1.188	12578	1.087	10736.4	1.153	3888.62	1.121	4845.75
	2877.87	1.241	2390.44	1.184	2480.4	1.322	1358.92	1.074	9113.68	1.274	7718.43	1.135	2314.32	1.221	1877.06	1.116	7746.97	1.052	6372.05	1.153	3336.32	1.222	4913.65	1.335	9917.27	1.155	1853.27	1.333	3429.74	2.156	2180.68	1.309	3623.07	1.332	3037.03	1.059	3125.69	1.109	5684.37	1.309	5199.97	1.132	3345.4	1.654	1876.19	1.158	16781.1	1.049	2354.54
	1060.49	1.272	4269.66	1.433	2432.39	1.15	4360.05	1.191	1617.99	1.345	3910.68	1.342	3654.21	1.191	1628.8	1.223	7027.72	1.135	4106.17	1.021	3422.39	1.335	3225.6	1.392	2118.83	1.27	2090.28	1.258	3526.19	1.584	4988.05	1.104	2024.11	1.173	3713.89	1.767	2916.79	1.265	3483.8	1.401	24535.4	1.062	3276.2	1.129	2559.11	1.131	2893.44	1.057	12968.1
	2828.56	1.452	3058.65	1.112	1926.8	1.634	2270.2	1.202	3779.63	1.086	2223.93	1.608	2323.83	1.33			27930.1	1.117	3250.68	1.029	5328.42	1.33	2682.38	1.252	4196.13	1.275	1414.28	1.294	3953.93	1.169	12853.1	1.102	2694.05	1.395	6849.97	1.188	2664.21	1.28	6264.79	1.228	1838.13	1.06	4108.34	1.277	10693.2	1.031	1786.66	1.172	2624.85
	4565.06	1.564	1681.57	1.846	6222.4	1.382	2166.84	1.928	2781.85	1.161	5068.49	1.116	2772.77	1.132			2219.17	1.138	2403.41	1.474	2691.46	1.208	3204.41	1.307	3540.89	1.097	1426.82	1.123	2069.95	1.136	7786.77	1.362	2527.54	1.468	2270.64	1.518	2980.37	1.297	2841.54	1.061	1797.48	1.27	2323.83	1.184	4447.85	1.679	4557.27	1.276	2771.04
	3167.21	1.065	2544.41	1.732	3039.19	1.362	7072.7	1.123	4497.15	1.245	4430.55	1.123	3002	1.044			18228.7	1.024	4499.75	1.345	3756.71	1.095	3121.8	1.081	2988.59	1.297	2804.78	2.112	2624.42	1.25	1454.07	1.352	2331.18	1.464	5966.36	1.287	5420.98	1.129	4698.7	1.213	29812.8	1.048	5996.64	1.236	2825.53	1.236	2567.76	1.32
	10897.3	1.218	2989.45	1.161	2806.51	1.216	1596.37	1.247	9288.84	1.177	21187.4	1.125	3225.17	1.204					6743.14	1.45	1570.41	1.057	2202.3	1.331	11288.3	1.157	2519.32	1.236	1703.62	1.159	1597.23	1.214	2420.28	1.083	3114.88	1.054	3810.34	1.925	5097.9	1.143	5518.29	1.379	3463.91	1.16			3906.36	1.161
	1390.93	1.22	3041.79	1.744	3219.11	1.463	2105.85	1.215	1673.35	1.194	5766.55	1.169	4759.68	1.263					5677.02	1.08	1553.55	1.087	2792.66	1.448	3075.52	1.313	2991.62	1.055	1445.42	1.18	1410.39	1.275	9736.92	1.213	2917.22	1.323	2668.1	1.148	4283.5	1.245			7145.8	1.143			15016.9	1.756
	2196.68	1.134	2954.42	1.282	1576.9	1.087	4393.79	1.858	5475.04	1.61			5606.09	1.082					3090.66	1.109	2980.8	1.142	6160.56	1.646	5020.05	1.065	3131.75	1.575	3895.55	1.157	5358.27	1.144	3587.17	1.587	2268.04	1.111	4811.58	1.085	2729.95	1.243			5555.06	1.58			3081.14	1.103
	10123.1	1.212	1886.57	1.497	1543.6	1.432	2170.3	1.254	3486.83	1.206			3638.21	1.044					1461.86	1.085			3732.49	1.556	4287.39	1.124	3155.97	1.105	2164.67	1.711	7341.72	1.156	2400.39	1.15	2714.82	1.067	3074.66	1.913	2908.14	1.256			3351.46	1.198			2688.86	1.315
	997.782	1.143	3373.95	1.072	2519.32	1.417	5188.73	1.102	8925.98	2.183			1750.34	1.269									3343.67	1.072	15258.7	1.308	4584.95	1.257	2619.23	1.391	1787.53	1.443	3150.78	1.367	9625.76	1.199	6617.28	1.055	2231.71	1.388			3355.78	1.247			2051.36	1.103
	2806.07	1.355	7604.68	1.784	1611.93	1.297	10672	1.115	2800.45	1.174			7285.49	1.116									2454.02	1.323	3394.71	1.265	3505.43	1.087	3180.19	1.306	3066.44	1.163	3101.47	1.117	2329.89	1.51	16041.5	1.297	2140.02	1.221			2765.42	1.26			3373.51	1.109
	9094.65	1.027	3044.38	1.358	1658.21	1.17	10627.4	1.069	4985.45	1.185			1980.86	1.166									5708.16	1.316	3928.85	1.096	2609.28	1.077	2635.67	1.413	3500.67	1.279	10394.8	1.269	16614.6	1.32	8336.91	1.221	4299.07	2.485			6054.59	1.221			4027.03	1.104
	3098.88	1.125	3354.05	1.654	4090.6	1.237	2447.53	1.164	3860.51	2.022			6460.71	1.164									24173.4	1.098	7657.45	1.318			2223.06	1.346	3730.33	1.021	1872.73	1.425	3028.38	1.383	3508.02	1.695	3523.59	1.143							2403.85	1.03
	2332.48	1.2	2240.36	1.184			1971.34	1.382	4068.11	1.283			9385.29	1.095									5799.42	1.485	2819.91	1.182			2242.95	1.442			4152.88	1.259	7243.54	1.532	3824.61	1.41	10392.2	1.151							13124.3	1.112
	1625.34	1.061	2121.42	1.452			7265.6	1.196	1998.59	1.028			8177.75	1.596									4076.33	1.124					1235.22	1.095			4216.89	1.155	9627.49	1.128	3435.36	1.131	7271.22	1.874							10720.4	1.107
	4267.5	1.393	2043.57	1.424			5844.4	1.266	2252.04	1.249			3740.28	1.091									8290.63	1.323					3493.75	1.307			2668.1	1.176	7155.31	1.212	6406.65	1.247	2881.33	1.098							2099.36	1.261
	1408.66	1.201					2325.99	1.412	2846.73	1.305			8326.96	1.188									7074.43	1.093					2726.93	1.017			3741.57	1.916			10529.3	1.543	3813.37	1.572							7195.53	1.135
	4461.69	1.142					4397.25	1.112	4870.4	1.072			4287.82	1.124															2449.26	1.188			3777.47	1.196			12847	1.097	6472.39	1.516							3489.86	1.722
	1778.45	1.187					3753.68	1.225	2838.51	1.335			3641.23	1.332															1205.38	1.201			2402.98	1.237					4115.69	1.342
	2960.91	1.211					3049.14	1.527	2776.23	1.189			7511.26	1.306															1380.11	1.079			6118.6	1.118					4234.19	1.625
	2630.48	1.081					1835.54	1.079	7229.7	1.223			3447.47	1.294															3184.08	1.061			5604.36	1.13					2889.11	1.273
	1694.11	1.313							2103.69	1.238			4827.15	1.386															2483.43	1.327			5904.52	1.196					2419.85	1.328
	6708.54	1.421							3866.57	1.704			7327.02	1.637															4426.66	1.658			4637.29	1.305					2665.51	1.354
									4736.76	1.443			3377.41	1.292															3793.91	1.563			3967.77	1.708
									3872.62	1.284																			2401.68	1.235			4913.65	1.272
									3210.46	1.538																			2170.3	1.199			4939.17	1.316
									5302.47	1.114																			4715.57	1.69			3164.18	1.098
									3732.92	1.485																			4943.93	1.431
									2985.56	1.263																			4852.24	1.254
									3429.74	1.04																			3074.66	1.46
									4741.52	1.146																			3647.29	1.089
									6565.38	1.714																			4737.19	1.303
									1612.8	1.119																			2244.68	1.379
									5278.69	1.27																			5288.2	1.502
									1550.09	1.223																			3280.96	1.093
									3779.2	1.308																			3584.58	1.359
									3024.05	1.274																			2577.71	1.41
									2530.57	1.909																			4358.75	1.128
									5889.38	1.167																			5856.08	1.611
									2941.01	1.193																			1709.68	1.467
									2349.78	1.202																			3634.31	1.184
									5136.39	1.311																			1280.21	1.183
									2495.97	1.347																			4083.68	1.804
									2633.5	1.147
									3997.61	1.231
									4298.2	1.103
									2451.42	1.746
									2138.29	1.275
									2723.47	1.347
[truncated: 71 more columns]

## Sheet: Data Fig 4
	Percetage of viable (Annexin V-, 7-AAD-), apoptotic (Annexin V+, 7-AAD-) and necrotic (Annexin V+, 7-AAD+) macrophages
		Donor 2			Donor 3			Donor 4			Donor 5
		AnV- 7-AAD-	AnV+ 7-AAD-	AnV+ 7-AAD+	AnV- 7-AAD-	AnV+ 7-AAD-	AnV+ 7-AAD+	AnV- 7-AAD-	AnV+ 7-AAD-	AnV+ 7-AAD+	AnV- 7-AAD-	AnV+ 7-AAD-	AnV+ 7-AAD+
	H37Rv	48.4	43.2	7.85	39.2	50.4	10.1	57.6	32.6	7.95	45.6	37.1	16.6
	L1A	58.5	29.9	10.8	61.8	24.3	12.1	54.4	29.2	14.8	52.6	30.3	15.2
	L1B	37.1	53	9.89	47.3	35.8	16.4	49.1	37.5	11.8	49.2	41.5	8.57
	L1C	42.1	50	7.69	60.5	29.5	9.31	36.9	47.1	14.9	41.5	37.4	20.2
	L2A	37.9	48.6	12.9	53.4	28.6	16.8	49.6	31.5	17.7	56.2	28.9	13.6
	L2B	38.2	53.2	8.36	52.6	37	9.6	35.9	53.4	10.2	49.1	32.8	16.6
	L2C	41.5	51.3	6.99	14.4	65.2	20.4	41.4	47.5	10.4	40.8	46.7	11.7
	L3A	48.2	40.9	10.3	51.1	34.9	13.3	35.5	50	13.7	42.3	36.7	19.5
	L3B	47.5	46.4	5.87	48.9	40.2	10.3	46.1	36	16.8	46.8	37.8	14.5
	L3C	41	53.1	5.9	41.7	45	12.8	45.3	44.3	9.93	40.2	43.2	16.1
	L4A	41.8	45.8	11.7	54.4	32.2	12	33	50.2	16.2	32.9	47.2	19.2
	L4B	41.1	48.3	10.1	43.4	45.2	10.7	45.4	45.2	8.85	50.1	37.2	12
	L4C	53.3	39.9	6.16	31.3	54.6	13.7	54.4	31.7	12.3	40.6	43.6	15.1
	L5A	42.4	43.5	13.4	64.6	26.9	7.46	39.7	34.5	23.2	33.2	47.4	19
	L5B	47.1	45.2	7.29	52.5	38.7	7.71	54.2	32.5	11.9	42.2	39.2	17.2

## Sheet: Data Fig 5
	Percentages of proliferating/activated CD4 or CD8 T cells
		% Proliferating (CFSE-) CD4 T cells						% CD38+ CD4 T cells						% HLA-DR+ CD4 T cells						% CD25+ CD4 T cells						% CD69+ CD4 T cells
		Donor 2	Donor 3	Donor 4	Donor 5			Donor 2	Donor 3	Donor 4	Donor 5			Donor 2	Donor 3	Donor 4	Donor 5			Donor 2	Donor 3	Donor 4	Donor 5			Donor 2	Donor 3	Donor 4	Donor 5
	UI	0.028	0.02	0.023	0.011		UI	0.21	0.47	0.23	0.28		UI	0.58	2.33	2.07	0.29		UI	0.44	0.85	1.72	0.37		UI	0.43	0.85	0.72	0.24
	H37Rv	0.034	0.56	7.34	0.023		H37Rv	0.41	0.74	8.03	0.28		H37Rv	0.71	1.53	7.36	0.48		H37Rv	0.53	0.53	8.96	0.78		H37Rv	0.34	0.47	3.94	0.29
	L1A	0.31	3.57	26.8	0.17		L1A	0.91	3.95	24.8	0.7		L1A	0.88	3.93	22.9	0.58		L1A	1.85	2.95	27.3	2.23		L1A	1.09	1.49	9.35	0.48
	L1B	0.48	0.013	3.5	0.00426		L1B	0.99	0.3	4.77	0.26		L1B	0.75	1.25	4.45	0.25		L1B	1.38	0.48	9.57	0.36		L1B	0.6	0.35	5.67	0.29
	L1C	0.057	1.19	4.41	0.016		L1C	0.35	1.45	4.43	0.27		L1C	0.71	2.06	4.92	0.37		L1C	0.57	0.96	8.63	0.79		L1C	0.32	0.95	4.07	0.24
	L2A	0.66	0.82	23.1	0.066		L2A	1.25	1.12	20.4	0.41		L2A	0.83	2.04	21.1	0.45		L2A	1.97	1.46	25.6	1.6		L2A	1.17	0.89	8.75	0.35
	L2B	0.1	0.03	9.06	0.00143		L2B	0.46	0.25	7.69	0.25		L2B	0.42	1.38	9.8	0.3		L2B	0.74	0.52	11.7	0.53		L2B	0.4	0.31	3.8	0.3
	L2C	0.041	0.036	1.4	0.033		L2C	0.28	0.31	1.91	0.26		L2C	0.61	1.38	1.96	0.47		L2C	0.61	0.53	5.4	0.77		L2C	0.4	0.53	2.86	0.33
	L3A	0.02	0.016	8.26	0.00417		L3A	0.36	0.33	7.28	0.28		L3A	0.61	1.49	8.91	0.31		L3A	1.13	0.6	13.9	0.5		L3A	0.7	0.4	5.75	0.31
	L3B	0.15	0.31	9.58	0.00261		L3B	0.42	0.51	9.53	0.27		L3B	0.53	1.44	8.97	0.54		L3B	0.75	0.87	14.5	0.47		L3B	0.37	0.55	6.73	0.29
	L3C	0.17	0.05	9.46	0.0073		L3C	0.49	0.33	8.1	0.29		L3C	0.63	1.52	9.12	0.43		L3C	0.89	0.61	13.5	0.67		L3C	0.38	0.49	6.19	0.28
	L4A	0.098	0.075	12.4	0.00419		L4A	0.54	0.52	10.3	0.32		L4A	0.67	1.76	12.6	0.35		L4A	1.24	0.66	16.4	0.84		L4A	0.88	0.5	6.08	0.31
	L4B	1.36	1.3	8.52	0.012		L4B	2.21	1.95	7.45	0.33		L4B	0.68	1.95	8.42	0.7		L4B	1.43	0.97	11.9	1.24		L4B	0.57	0.95	5.49	0.31
	L4C	0.25	0.09	9.92	0.00683		L4C	0.69	0.42	8.85	0.28		L4C	0.63	1.5	10.4	0.71		L4C	1.2	0.58	11.8	0.83		L4C	0.71	0.59	5.97	0.41
	L5A	0.34	0.27	16.5	0.049		L5A	0.83	0.94	14.5	0.38		L5A	0.77	2.87	16.3	0.31		L5A	1.6	1.36	16.6	1.51		L5A	0.84	1.14	5.58	0.36
	L5B	0.19	2.77	18.9	0.062		L5B	0.61	4.11	16.9	0.4		L5B	0.74	3.76	17.5	0.48		L5B	1.01	1.1	18.8	1.69		L5B	0.54	1.39	6.67	0.34
		% CD38+ CD8 T cells						% CD69+ CD8 T cells
		Donor 2	Donor 3	Donor 4	Donor 5			Donor 2	Donor 3	Donor 4	Donor 5
	UI	0.51	1.29	0.39	0.42		UI	0.68	2.11	0.84	0.071
	H37Rv	1.55	0.75	6.12	0.96		H37Rv	1.23	1.89	7.29	0.53
	L1A	1.28	1.32	8.16	1.92		L1A	2.98	4.73	13.6	1.07
	L1B	1.65	0.65	7.98	0.34		L1B	2.71	0.93	11.1	0.17
	L1C	1.2	1.6	5.73	0.81		L1C	1.09	4.64	7.76	0.47
	L2A	1.1	1.18	7.68	1.03		L2A	4.01	2.42	12.3	0.57
	L2B	1.04	0.63	5.54	0.8		L2B	1.49	1.06	7.65	0.43
	L2C	0.71	0.93	4.12	0.48		L2C	1.1	3.34	6.58	0.66
	L3A	0.82	0.88	7.48	0.5		L3A	1.52	1.7	10.9	0.21
	L3B	0.95	1.21	9.8	0.86		L3B	1.35	1.86	12	0.57
	L3C	1.17	1.11	7.77	0.64		L3C	1.76	1.65	11.5	0.47
	L4A	1.33	1.01	7.11	0.58		L4A	2.7	1.86	11	0.64
	L4B	1.48	2.04	7.97	1.38		L4B	2.37	6.47	10.5	0.61
	L4C	1.13	1.36	8.29	0.71		L4C	2.23	1.89	11.2	0.62
	L5A	2.11	1.38	5.86	0.6		L5A	4.34	4.87	8.31	0.51
	L5B	1.71	3.41	7.85	0.96		L5B	3.04	6.01	10.7	0.54

## Sheet: Data Fig 5C
	Number of CD4 T cells expressing each potential marker combination
						Donor 2				Donor 3				Donor 4				Donor 5
	CD25+	CD38+	CD69+	HLA-DR+	CFSE-	L1A	L2A	L5A	L5B	L1A	L2A	L5A	L5B	L1A	L2A	L5A	L5B	L1A	L2A	L5A	L5B
	x					906	1004	794	492	144	108	67	71	2791	2919	2840	2342	1458	1006	1202	1121
				x		307	251	271	293	243	206	361	239	209	259	236	235	235	209	191	243
			x			542	688	427	282	117	64	74	77	1848	1996	1557	1585	225	134	196	110
		x				360	399	288	261	106	64	67	109	500	457	410	415	305	227	265	216
	x	x		x	x	97	89	107	47	157	49	18	11	8673	7737	4468	4947	32	15	3	11
		x		x	x	2	98	14	20	158	8	6	185	2561	1734	3117	2262	0	0	0	0
		x			x	31	157	41	12	242	43	20	339	1606	956	570	932	10	0	2	1
	x			x	x	17	18	4	14	76	16	2	4	4043	4287	2786	2835	4	4	0	2
	x		x			203	223	134	82	26	23	21	20	880	890	630	608	67	72	77	88
	x	x			x	100	281	75	31	118	11	8	6	1814	1362	604	922	60	23	15	19
	x			x		103	103	82	77	74	44	74	24	309	354	303	261	49	39	23	27
	x		x	x		91	127	49	46	47	45	103	70	143	160	131	126	15	30	20	38
		x		x		40	43	36	69	64	21	47	166	154	138	217	190	65	22	27	32
	x	x	x	x		50	54	37	19	34	19	18	27	548	495	296	298	12	3	2	6
	x	x		x		42	41	33	26	54	7	10	16	567	556	467	468	9	2	3	4
	x	x	x	x	x	4	5	11	3	23	9	0	0	1329	1312	563	590	13	1	2	2
				x	x	0	0	0	7	81	24	0	28	175	207	624	532	0	0	1	0
			x	x		37	31	15	20	20	16	30	34	72	95	83	88	13	12	8	12
		x	x	x		20	10	13	14	37	12	27	64	113	114	98	133	9	3	1	2
	x	x				44	55	29	19	32	4	4	4	228	166	124	115	19	11	6	11
	x	x	x		x	6	13	8	0	15	3	1	0	984	727	338	385	4	0	7	1
					x	17	25	26	12	48	7	5	53	20	39	89	25	2	0	1	1
		x	x		x	0	4	2	0	23	7	0	8	750	518	291	457	1	0	0	2
	x	x	x			31	52	28	14	7	1	0	3	445	360	217	205	2	3	6	4
		x	x			17	20	3	3	19	1	2	11	333	303	173	275	9	1	4	2
		x	x	x	x	0	1	2	0	30	9	0	11	351	291	213	246	2	0	0	0
	x				x	10	4	4	23	17	8	4	2	184	243	85	106	3	4	11	5
			x		x	1	3	1	0	3	1	1	0	17	17	13	15	1	2	1	5
	x		x	x	x	0	1	0	0	9	0	0	0	51	68	31	30	0	0	0	0
			x	x	x	0	0	1	0	7	1	0	1	9	22	15	7	1	1	2	0
	x		x		x	1	1	0	0	4	0	0	0	17	26	20	16	0	0	0	0

## Sheet: Data Fig 6
	Concentration of soluble factors induced by infection on day 1 p.i. or day 8 p.i.
		[CXCL9] (pg/ml) on d1 p.i.						[TNF-𝛂] (pg/ml) on d1 p.i.						[IL-10] (pg/ml) on d1 p.i.						[IL-1β] (pg/ml) on d1 p.i.
		Donor 1	Donor 2	Donor 3	Donor 4			Donor 1	Donor 2	Donor 3	Donor 4			Donor 1	Donor 2	Donor 3	Donor 4			Donor 1	Donor 2	Donor 3	Donor 4
	UI	10.6674	5.39948	10.0546	6.69842		UI	95.0224	3.28574	11.3624	7.27724		UI	3.85249	0.816666	0.868353	1.44467		UI	50.7908	1.87574	5.04505	7.88014
	H37Rv	12.5728	9.02186	22.6192	11.7272		H37Rv	353.142	121.198	309.026	540.146		H37Rv	10.0137	7.71987	5.29927	25.5887		H37Rv	488.988	150.643	242.753	384.05
	L1A	18.5453	11.5218	26.7559	32.1788		L1A	847.824	151.806	321.119	708.687		L1A	16.0352	7.6458	5.2816	26.9166		L1A	553.685	41.3945	93.5303	247.515
	L1B	21.9678	7.12647	5.39948	10.2594		L1B	329.544	19.5907	302.579	132.878		L1B	7.67434	1.39195	3.95552	5.58433		L1B	474.415	25.4447	136.066	113.478
	L1C	16.5645	7.33956	11.7786	3.41581		L1C	632.053	55.5166	611.087	361.563		L1C	13.8361	2.70901	5.07913	9.04431		L1C	763.028	40.7894	193.282	188.142
	L2A	31.8659	11.0006	33.3263	22.1293		L2A	1069.08	92.7566	455.106	733.038		L2A	17.2587	4.18762	5.27366	32.1546		L2A	917.913	28.6523	185.184	345.465
	L2B	14.8345	4.19105	14.251	10.4637		L2B	524.604	74.591	635.556	861.728		L2B	12.0299	4.0584	7.18091	25.428		L2B	872.081	106.709	512.829	654.387
	L2C	12.4143	8.49144	17.4643	6.3228		L2C	485.185	37.5537	532.84	420.844		L2C	11.4297	2.41992	5.60778	13.9539		L2C	445.057	28.4755	226.535	365.054
	L3A	12.0791	7.23309	11.2754	7.76387		L3A	552.133	67.0257	612.831	973.68		L3A	9.04431	3.17903	6.48591	19.937		L3A	861.773	101.181	447.281	574.144
	L3B	13.2704	5.18092	18.2669	9.22978		L3B	504.038	27.7643	590.206	317.749		L3B	12.0777	1.86703	6.68501	11.5042		L3B	940.674	38.5823	376.399	306.743
	L3C	18.9223	6.91276	14.0557	7.23309		L3C	533.193	115.009	632.053	514.313		L3C	12.0299	5.58433	6.93328	18.2091		L3C	961.147	127.685	629.22	629.22
	L4A	20.4998	7.55203	16.9451	9.74634		L4A	475.012	104.156	663.669	552.133		L4A	10.6885	7.47726	8.16549	20.9624		L4A	848.114	169.65	545.647	600.606
	L4B	16.5645	7.9751	13.2704	3.19395		L4B	531.474	85.7979	774.221	770.613		L4B	13.2673	4.16113	7.96929	22.1729		L4B	1096.56	133.579	646.537	493.701
	L4C	16.7549	10.2594	15.8952	11.8789		L4C	709.707	63.2119	810.469	572.867		L4C	12.0299	3.23106	9.43292	17.7412		L4C	872.573	77.2773	665.791	503.236
	L5A	24.3233	8.18571	18.3608	11.0733		L5A	699.043	147.009	795.934	425.754		L5A	13.9308	7.57585	7.77275	13.5993		L5A	932.034	84.6298	386.685	356.043
	L5B	25.4276	10.2569	36.5555	7.9641		L5B	842.827	117.885	673.871	249.858		L5B	14.8528	6.64981	9.93891	10.1541		L5B	611.667	42.5787	214.085	281.406
		[Granzyme B] (pg/ml) on d8 p.i.						[TNF-𝛂] (pg/ml) on d8 p.i.						[IL-1β] (pg/ml) on d8 p.i.						[IL-13] (pg/ml) on d8 p.i.
		Donor 1	Donor 2	Donor 3	Donor 4			Donor 1	Donor 2	Donor 3	Donor 4			Donor 1	Donor 2	Donor 3	Donor 4			Donor 1	Donor 2	Donor 3	Donor 4
	UI	10.6431	5.93009	5.93009	5.93009		UI	19.5907	3.28574	7.27724	3.28574		UI	20.1812	0.880187	1.5363	2.22005		UI	22.6288	0.382818	0	1.72788
	H37Rv	110.547	713.746	15.2793	554.831		H37Rv	112.289	406.013	13.434	181.782		H37Rv	365.488	133.559	235.856	398.914		H37Rv	93.2421	262.722	7.69266	444.26
	L1A	649.383	2529.37	209.229	2666.79		L1A	174.382	1083.88	45.7559	882.918		L1A	342.516	169.106	123.654	414.427		L1A	55.0316	190.41	3.67028	409.988
	L1B	327.745	530.745	10.6431	356.025		L1B	167.982	205.919	35.8331	118.604		L1B	455.37	122.425	283.583	85.2423		L1B	130.093	146.999	4.70308	232.27
	L1C	335.075	1353.89	44.6293	655.551		L1C	173.19	473.309	27.7643	326.175		L1C	987.028	274.357	498.858	407.854		L1C	166.953	151.521	4.70308	473.043
	L2A	551.406	1966.4	439.029	1175.86		L2A	317.752	1077.91	61.1574	816.315		L2A	844.151	295.209	166.092	625.849		L2A	48.7293	173.478	5.45601	479.18
	L2B	171.654	201.978	19.9155	233.177		L2B	89.4994	132.878	15.4769	107.786		L2B	527.331	177.275	500.051	259.789		L2B	228.607	168.034	11.3443	339.8
	L2C	127.938	885.626	34.4953	449.373		L2C	28.7782	422.495	33.7945	296.651		L2C	263.273	210.201	442.588	345.719		L2C	195.178	112.053	10.4463	491.121
	L3A	198.058	439.011	15.3342	376.688		L3A	167.982	267.127	13.4183	456.293		L3A	468.56	276.061	363.28	839.383		L3A	193.81	109.285	12.0548	908.24
	L3B	273.222	639.34	32.8399	855.391		L3B	183.571	262.052	11.3624	854.368		L3B	652.64	237.385	334.196	579.152		L3B	304.161	134.845	25.0655	853.873
	L3C	140.896	187.095	19.9155	137.414		L3C	143.488	93.1852	19.5907	87.6506		L3C	692.395	262.825	590.055	355.322		L3C	229.829	111.218	3.19887	218.017
	L4A	189.109	443.631	51.9663	827.502		L4A	122.187	202.492	27.7643	565.947		L4A	557.563	249.044	527.331	866.184		L4A	200.962	80.9779	14.8354	769.293
	L4B	501.793	428.98	10.6431	536.077		L4B	378.428	214.472	15.4769	334.599		L4B	753.296	265.192	579.57	612.505		L4B	233.244	130.691	4.70308	799.538
	L4C	1017.52	1287.25	58.953	709.26		L4C	632.053	324.49	23.6891	407.139		L4C	787.822	354.961	539.926	528.95		L4C	407.072	149.832	9.17637	717.412
	L5A	184.055	373.525	65.6367	610.135		L5A	147.009	260.36	31.8128	517.741		L5A	903.332	200.379	464.669	696.869		L5A	130.093	169.92	4.70308	454.177
	L5B	155.641	815.674	61.3832	124.562		L5B	89.746	353.14	31.7569	135.206		L5B	542.238	242.612	273.242	146.084		L5B	36.5264	99.6844	9.69421	257.704
		[IFN-𝛾] (pg/ml) on d8 p.i.						[IL-17A] (pg/ml) on d8 p.i.						[IL-17F] (pg/ml) on d8 p.i.						[IL-22] (pg/ml) on d8 p.i.
		Donor 1	Donor 2	Donor 3	Donor 4			Donor 1	Donor 2	Donor 3	Donor 4			Donor 1	Donor 2	Donor 3	Donor 4			Donor 1	Donor 2	Donor 3	Donor 4
	UI	29.095	0.218517	0.780915	1.54107		UI	1.30087	0.0367489	0.180492	0.310445		UI	3.09739	0.326154	0.326154	1.24817		UI	8.39834	0.322336	0.396532	0.983892
	H37Rv	621.285	1781.06	159.693	1235.29		H37Rv	2.69884	18.5795	2.15154	37.0443		H37Rv	82.639	463.642	40.2484	502.561		H37Rv	33.2146	35.8767	4.9738	53.5519
	L1A	1526.01	2681.63	682.929	2857.86		L1A	21.373	25.2187	9.53521	33.1328		L1A	256.064	514.874	139.738	709.575		L1A	22.2019	49.2383	16.2493	67.6156
	L1B	1506.01	2462.77	212.607	1041.88		L1B	9.67604	33.0107	5.22841	22.2046		L1B	121.485	810.052	57.0968	242.683		L1B	30.7335	16.1593	1.31606	20.228
	L1C	2264.03	2331.21	784.163	2197.6		L1C	10.5432	54.9818	7.28853	29.4161		L1C	162.049	769.112	164.862	417.315		L1C	31.4779	23.9665	7.93108	43.7485
	L2A	2374	2330.9	641.246	2145.57		L2A	11.6609	25.4516	3.58639	65.2188		L2A	176.578	611.204	63.6982	711.202		L2A	27.4151	45.2493	5.37568	48.337
	L2B	1084.03	1839.87	200.133	831.343		L2B	6.87756	40.0984	2.56997	17.4395		L2B	146.369	756.306	70.593	340.81		L2B	17.3585	22.2362	2.22724	20.2704
	L2C	580.722	1845.12	732.984	1782.71		L2C	7.78836	40.4454	7.65826	31.5667		L2C	214.757	620.612	158.14	536.333		L2C	35.9755	19.9232	8.30397	31.7235
	L3A	950.745	3226.22	239.164	2405.37		L3A	8.17838	34.3382	5.05448	34.2347		L3A	110.741	768.792	75.6533	618.514		L3A	17.8067	25.8231	7.22237	67.5594
	L3B	1717.47	2771.24	508.063	2920.84		L3B	15.4918	24.289	11.3605	32.3478		L3B	141.814	573.387	188.21	542.263		L3B	68.5767	25.9286	15.9014	46.2658
	L3C	1317.55	2789.89	347.741	904.216		L3C	7.52293	60.9618	3.69268	26.1327		L3C	122.537	791.413	88.6609	311.744		L3C	32.053	39.463	5.37637	32.3942
	L4A	1191.76	3015.75	508.063	2891.32		L4A	4.23644	50.4206	8.55714	154.957		L4A	74.0808	861.539	133.481	700.959		L4A	11.3555	25.0001	46.1315	84.5976
	L4B	1881.43	2877.67	168.203	1564.85		L4B	6.91885	76.191	3.62393	39.8889		L4B	107.831	928.986	131.223	347.654		L4B	29.248	32.6503	1.81493	30.2025
	L4C	2201.86	3989.71	566.844	2145.73		L4C	11.3227	72.608	6.47254	37.2097		L4C	169.638	868.912	142.159	638.066		L4C	19.8255	45.4387	7.48338	48.2222
	L5A	2934.74	1605.29	687.162	2582.41		L5A	12.4568	22.2479	8.35818	54.2388		L5A	195.475	590.03	140.061	542.356		L5A	13.0364	19.9315	8.81564	43.0846
	L5B	1209.21	1909.29	561.857	686.127		L5B	10.7309	35.2706	7.45794	17.0139		L5B	172.934	590.298	125.825	328.477		L5B	11.5655	43.5428	9.23913	10.3411

## Sheet: Data Fig 6E
	Bright field images used to quantify in vitro granuloma formation (No. aggregates) and measure the area and aspect ratio (AR) of each individual aggregate
	Donor 3								Donor 4								Donor 6								Donor 7
	L1A + Iso		L1A + GEVO		L4C + Iso		L4C + GEVO		L1A + Iso		L1A + GEVO		L4C + Iso		L4C + GEVO		L1A + Iso		L1A + GEVO		L4C + Iso		L4C + GEVO		L1A + Iso		L1A + GEVO		L4C + Iso		L4C + GEVO
No. Granulomas	47		18		9		10		38		33		18		17		49		31		15		9		34		42		18		17
	Area	AR	Area	AR	Area	AR	Area	AR	Area	AR	Area	AR	Area	AR	Area	AR	Area	AR	Area	AR	Area	AR	Area	AR	Area	AR	Area	AR	Area	AR	Area	AR
	6876.76	1.459	1517.21	1.29	2572.51	1.147	2024.1	2.341	4947.8	1.297	2840.66	1.439	7068.79	1.644	15646.1	1.134	949.771	1.532	4257.53	1.507	3356.2	1.448	2970.41	1.93	4380.36	1.234	2076	1.175	4932.23	1.4	3662.41	1.619
	9667.25	1.448	6234.93	1.994	1973.93	1.079	813.101	1.715	3733.34	1.485	3954.78	1.388	6843.89	1.324	11547.8	1.095	1896.08	1.856	1953.17	1.371	9611.89	2.362	3203.96	1.69	2020.64	1.406	1569.11	1.311	11281.3	1.202	1558.73	1.156
	6183.03	1.714	4752.31	1.262	1340.75	1.103	1197.16	1.573	2389.13	1.757	2944.46	1.671	7068.79	1.079	1468.77	1.145	2044.86	1.855	1965.28	1.547	3027.5	1.572	1444.55	1.183	2473.9	1.876	2326.85	1.427	4157.19	1.053	4823.24	1.787
	5368.19	1.445	2793.95	1.465	1998.15	1.425	999.941	1.282	4413.23	2.154	1776.71	1.558	2792.22	1.106	2096.76	1.416	1742.11	1.229	2617.49	1.045	3809.46	1.333	1378.81	1.359	1380.54	1.403	2873.53	2.958	1761.14	1.259	2999.82	1.286
	7868.05	1.31	2420.27	1.462	1025.89	1.113	1169.48	1.387	3499.79	2.044	4385.55	1.475	2216.13	1.115	7468.42	1.128	3556.88	1.318	3252.4	1.611	4262.72	1.127	1569.11	1.244	3591.48	1.673	5651.91	1.098	2899.48	1.266	3382.15	1.937
	3524.01	1.12	2684.96	1.657	3197.04	1.321	1399.57	1.634	15364.1	1.833	3136.49	1.669	6651.86	1.015	3158.98	1.008	3653.76	1.26	3370.04	1.434	2008.53	1.075	1489.53	1.224	2588.08	1.697	4107.02	1.189	3357.93	1.078	1640.04	1.218
	1321.72	1.308	719.681	2.142	908.251	1.159	1055.3	1.263	5324.94	2.497	5061.98	2.867	8644.82	1.133	3460	1.217	2186.72	1.291	5444.31	2.353	2627.87	1.176	1422.06	1.288	2314.74	1.331	7717.54	1.476	30070.9	1.256	1363.24	1.547
	4939.15	1.48	932.471	1.371	1453.2	1.215	1038	2.182	2752.43	1.401	3916.72	1.362	1371.89	1.224	2550.02	1.011	2790.49	1.338	3226.45	1.373	5944.28	1.122	2368.37	1.529	1849.37	1.624	2076	1.474	3470.38	1.146	2167.69	1.602
	1313.07	1.31	2006.8	3.282	961.881	1.175	579.551	1.975	1774.98	1.346	3923.64	1.537	1795.74	1.314	4062.04	1.383	2674.58	1.206	3435.78	1.19	1686.75	1.189	1288.85	1.391	1844.18	1.469	1605.44	1.406	5347.44	1.188	4603.53	1.638
	1314.8	1.501	1686.75	1.714			519	1.382	2295.71	1.359	2693.61	1.398	1645.23	1.018	24213.1	1.036	3568.99	1.388	2005.07	1.732	2015.45	1.027			3479.03	1.281	3593.21	1.471	28660.9	1.223	2774.92	1.32
	1842.45	1.223	1745.57	2.784					2359.72	1.523	3934.02	2.598	24720	1.177	1472.23	1.163	1970.47	1.134	2902.94	1.686	14362.5	1.233			3150.33	1.418	2146.93	1.83	3062.1	1.233	2838.93	1.591
	5361.27	1.712	1036.27	1.329					5686.52	1.437	2548.29	1.244	9489.06	1.087	1766.33	1.146	3378.69	1.667	5819.73	1.816	5574.06	1.105			12234.6	2.316	1665.99	1.558	2607.11	1.562	2548.29	1.837
	3145.14	1.527	1323.45	2.387					2506.77	1.498	3465.19	1.195	3735.07	1.262	6542.87	1.206	1527.59	1.491	10539.2	2.423	1915.11	1.25			8421.65	1.175	3996.3	1.424	1557	1.34	3219.53	1.232
	6420.04	1.376	1527.59	2.008					8598.11	1.776	2370.1	1.984	2947.92	1.083	12578.8	1.288	3645.11	1.062	2198.83	1.419	2479.09	1.278			4961.64	1.624	2056.97	2.47	1603.71	1.654	2857.96	1.371
	5506.6	1.631	3371.77	1.298					1460.12	2.122	6101.72	1.706	57536.4	1.218	2698.8	1.606	2307.82	1.365	5444.31	2.052	4937.42	1.081			5636.35	2.061	3214.34	1.313	7902.65	1.218	1186.78	1.493
	1115.85	1.408	1512.02	1.809					7525.51	1.119	4648.51	3.347	17300	1.118	1937.6	1.339	4177.95	1.776	4295.59	1.185					1570.84	1.146	1863.21	1.328	3679.71	1.634	2165.96	2.116
	2266.3	1.497	1558.73	1.542					3591.48	1.89	5217.69	1.225	2859.69	1.218	11371.3	1.077	2911.59	1.164	8113.71	1.263					3395.99	1.589	4312.89	1.737	6814.48	1.184	890.951	1.138
	4131.24	1.532	1608.9	1.679					6830.05	1.48	1430.71	1.615	3274.89	1.319			4601.8	1.361	6715.87	1.787					3778.32	1.38	2726.48	2.385	3306.03	1.134
	2569.05	1.157							2458.33	1.44	1404.76	1.284					3003.28	1.219	3060.37	1.433					1790.55	1.572	3667.6	2.293
	1731.73	1.305							2714.37	1.876	5451.23	2.955					3176.28	1.604	3799.08	1.112					3055.18	1.2	2781.84	2.322
	1698.86	1.294							3446.16	1.661	2915.05	1.358					5418.36	1.651	3171.09	1.245					3228.18	1.961	8070.46	1.083
	7421.71	1.149							2266.3	1.868	2233.43	1.916					3010.2	1.395	2638.25	1.586					3380.42	1.339	3626.08	1.423
	6842.16	1.398							2918.51	1.433	1942.79	1.739					2866.61	1.188	1956.63	1.122					4255.8	1.125	6764.31	1.12
	2077.73	1.341							3283.54	1.433	2563.86	1.339					2191.91	1.076	2300.9	1.522					2733.4	1.461	987.831	1.491
	2055.24	1.138							3427.13	1.204	2513.69	1.483					5664.02	1.426	2525.8	1.564					3565.53	1.292	1866.67	1.602
	3008.47	1.083							4617.37	1.377	1970.47	1.813					1432.44	1.337	2076	1.575					2518.88	1.109	3769.67	1.551
	5473.73	1.574							6029.06	1.424	3527.47	1.405					1339.02	1.147	2043.13	2.306					3056.91	1.658	2063.89	2.007
	2793.95	1.493							2025.83	1.419	2418.54	1.523					1735.19	2.348	2736.86	1.518					2645.17	1.395	1676.37	3.127
	1951.44	1.408							2953.11	2.168	9809.11	2.519					2003.34	1.656	2781.84	1.179					2835.47	2.183	2593.27	2.342
	1283.66	1.483							1325.18	1.512	11546	2.164					2530.99	2.008	1882.24	1.122					5029.11	1.471	2826.82	1.907
	1593.33	1.801							1596.79	1.674	14978.4	1.403					2709.18	1.401	4812.86	1.197					2479.09	1.326	4643.32	1.82
	2368.37	1.105							3112.27	1.307	2506.77	1.6					2293.98	1.142							1553.54	1.655	4579.31	1.632
	2487.74	1.559							2399.51	1.683	2311.28	1.236					1150.45	1.243							1153.91	1.212	1468.77	1.199
	1861.48	1.34							7177.78	1.232							2716.1	2.206							2951.38	1.375	7727.92	1.551
	1838.99	1.411							5409.72	2.166							1560.46	1.372									1358.05	1.467
	2766.27	2.289							7214.11	1.791							3904.61	1.239									2077.73	1.624
	2224.78	1.206							2029.29	1.351							2979.06	1.247									3793.89	1.14
	3221.26	1.332							3328.52	1.335							3049.99	1.175									8233.08	1.378
	1880.51	1.574															5433.94	1.258									2643.44	2.058
	809.641	1.26															1717.89	1.415									1183.32	1.565
	1660.8	1.31															3812.92	1.676									1409.95	1.827
	2562.13	1.099															1224.84	1.346									1956.63	1.8
	1335.56	1.77															5432.2	1.681
	1669.45	1.692															2223.05	1.653
	2076	1.34															2783.57	1.21
	1653.88	1.403															1771.52	1.155
	1821.69	1.447															1494.72	1.142
																	4473.78	1.391
																	4065.5	1.67

## Sheet: Data Fig 6H
	CFU/well data
		L1A		L2C
		Iso	𝛼-CXCL9	Iso	𝛼-CXCL9
	Donor 3	31000	28000	65000	83000
	Donor 4	14666.7	13333.3	320000	380000
	Donor 6	34333.3	33666.7	153667	146333
	Donor 7	57333.3	39000	303333	330000
